# Supplementary material
Source: publisher figshare collection journal article supplement (https://karger.figshare.com/ndownloader/files/27778314)
Supplement: Supplementary file 1 [file 27778314]

## Sheet: Tabelle1
Treatment Pubmed vs clinicaltrials.gov	Research tool	Total raw results	Unique results	Unique, right	Total, right	Total relevant (Risklick+ Pubmed)	TP	TN	FP	FN	Recall	Precision	F1 Score
Antibiotic	Risklick	104	16	10	98	100	98	0	6	2	0.98	0.942308	0.960784
	clinicaltrials.gov	109	21	2	90		90	0	19	10	0.9	0.825688	0.861244
Anticoagulant	Risklick	70	20	16	66	67	66	0	4	1	0.985075	0.942857	0.963504
	clinicaltrials.gov	55	5	1	51		51	0	4	16	0.761194	0.927273	0.836066
Antiviral	Risklick	185	83	54	156	160	156	0	29	4	0.975	0.843243	0.904348
	clinicaltrials.gov	145	43	4	106		106	0	39	54	0.6625	0.731034	0.695082
Azithromycin	Risklick	78	0	0	78	78	78	0	0	0	1	1	1
	clinicaltrials.gov	86	8	0	78		78	0	8	0	1	0.906977	0.95122
Heparin	Risklick	49	13	13	49	49	49	0	0	0	1	1	1
	clinicaltrials.gov	36	0	0	36		36	0	0	13	0.734694	1	0.847059
Remdesivir	Risklick	22	0	0	22	22	22	0	0	0	1	1	1
	clinicaltrials.gov	22	0	0	22		22	0	0	0	1	1	1
Tocilizumab	Risklick	50	4	4	50	50	50	0	0	0	1	1	1
	clinicaltrials.gov	46	0	0	46		46	0	0	4	0.92	1	0.958333
Hydroxy-chloroquine	Risklick	212	19	10	203	203	203	0	9	0	1	0.957547	0.978313
	clinicaltrials.gov	209	16	0	193		193	0	16	10	0.950739	0.923445	0.936893
Treatment Risklick vs Pubmed
Antithrombotic	Risklick	55	22	22	55	64	55	0	0	9	0.859375	1	0.92437
	Pubmed	43	10	9	42		42	0	1	22	0.65625	0.976744	0.785047
Dexamethasone	Risklick	71	44	38	65	72	65	0	6	7	0.902778	0.915493	0.909091
	Pubmed	39	12	7	34		34	0	5	38	0.472222	0.871795	0.612613
Favipiravir	Risklick	107	43	34	98	117	98	0	9	19	0.837607	0.915888	0.875
	pubmed	104	40	19	83		83	0	21	34	0.709402	0.798077	0.751131
Suppl. Table 3: Raw data for each individual drugs and drug categories used in calculation of recall, precision and F1 score for Risklick AI, clinicaltrials.gov and Pubmed searches.
